# Supplementary material for: Genetic Diversity and Expanded Host Range of J Paramyxovirus Detected in Wild Small Mammals in China
Source: MDPI journal article supplement (doi:10.3390/v15010049), 2022-12-23
Supplement: s1 [file s1]

**Table S1.** GenBank accession numbers of viruses used for phylogenetic analysis in this study.

| Genus                    | Species                        | Abbreviation | GenBank Accession Number (Nucleotide) | GenBank Accession Number (Amino Acid) |
|--------------------------|--------------------------------|--------------|---------------------------------------|---------------------------------------|
| <i>Metaavulavirus</i>    | Avian metaavulavirus 2         | APMV-2       | HM159993.1                            | ACA49110.1                            |
|                          | Avian metaavulavirus 5         | APMV-5       | GU206351.1                            | ADD39006.1                            |
|                          | Avian metaavulavirus 6         | APMV-6       | AY029299.1                            | ABQ45549.1                            |
|                          | Avian metaavulavirus 7         | APMV-7       | FJ231524.1                            | ACN72645.1                            |
|                          | Avian metaavulavirus 8         | APMV-8       | FJ619036.1                            | AUJ87608.1                            |
|                          | Avian metaavulavirus 10        | APMV-10      | HM147142.3                            | ADK12969.2                            |
|                          | Avian metaavulavirus 11        | APMV-11      | JQ886184.1                            | AFN06859.1                            |
|                          | Avian metaavulavirus 14        | APMV-14      | KX258200.1                            | APP90895.1                            |
|                          | Avian metaavulavirus 15        | APMV-15      | KX932454.2                            | ARO49358.2                            |
| <i>Orthoavulavirus</i>   | Avian metaavulavirus 20        | APMV-20      | MF033136.1                            | ACO48302.2                            |
|                          | Avian orthoavulavirus 1        | APMV-1       | AF309418.1                            | AAS67167.1                            |
|                          | Avian orthoavulavirus 9        | APMV-9       | EU910942.1                            | ACJ82944.1                            |
|                          | Avian orthoavulavirus 12       | APMV-12      | KC333050.1                            | AGH32603.1                            |
|                          | Avian orthoavulavirus 13       | APMV-13      | MN150295                              | BAV03985.1                            |
|                          | Avian orthoavulavirus 16       | APMV-16      | KY511044.1                            | ARV85980.1                            |
|                          | Avian orthoavulavirus 17       | APV-B(17)    | KY452442.1                            | ARU83011.1                            |
|                          | Avian orthoavulavirus 18       | APV-B(18)    | KY452443.1                            | ARU83017.1                            |
|                          | Avian orthoavulavirus 19       | APV-B(19)    | KY452444.1                            | ARU83023.1                            |
| <i>Paraavulavirus</i>    | Avian orthoavulavirus 21       | APMV-21      | MF594598.1                            | -                                     |
|                          | Avian paraavulavirus 3         | APMV-3       | EU782025.1                            | ACI47553.1                            |
| <i>Synodonvirus</i>      | Avian paraavulavirus 4         | APMV-4       | JX987283.1                            | ACF60579.1                            |
|                          | Synodus synodonvirus           | WTLPV        | MG600058                              | AVM87369.1                            |
| <i>Aquaparamyxovirus</i> | Oncorhynchus aquaparamyxovirus | PSPV         | MH900517                              | AYN62580.1                            |
|                          | Salmo aquaparamyxovirus        | SAV          | EU156171.1                            | ABX57743.1                            |
| <i>Ferlavirus</i>        | Reptilian ferlavirus           | FDLV         | AY141760.2                            | AAN18266.1                            |
| <i>Henipavirus</i>       | Nipah henipavirus              | NiV          | AF212302.2                            | AAK29089.1                            |
|                          | Hendra henipavirus             | HeV          | AF017149.3--ok                        | AAC83194.3                            |
|                          | Hendra henipavirus genotype 2  | HeV-g2       | MZ229746                              | -                                     |
|                          | Cedar henipavirus              | CedV         | JQ001776.1                            | AFP87280.1                            |
|                          | Ghanaian bat henipavirus       | GhV          | HQ660129.1                            | AET43339.1                            |
|                          | Mojang henipavirus             | MojV         | KF278639.1                            | AHM23778.1                            |
|                          | Daeryong virus                 | DARV         | MZ574408                              | -                                     |
|                          | Gamak virus                    | GAKV         | MZ574409                              | -                                     |
|                          | Beilong jeilong virus          | BeiV         | NC007803                              | AAZ82812.1                            |
| <i>Jeilongvirus</i>      | Jun jeilongvirus               | JPV          | AY900001                              | AAX86035.1                            |
|                          | Jun jeilongvirus               | JPV          | NC007454                              | YP_338085.1                           |
|                          | Lophuromys jeilongvirus 1      | MMLV-1       | MG573140                              | AVM86019.1                            |

|                         |                              |         |             |            |
|-------------------------|------------------------------|---------|-------------|------------|
|                         | Jeilongvirus anhuiense       | MisPV   | KC154054    | AGU69458.1 |
|                         | Jeilongvirus apodemi         | RoPV    | KY370098    | ATP66853.1 |
|                         | Jeilongvirus comorosense     | BatPV-1 | MG203877    | AYM47528.1 |
|                         | Jeilongvirus erinacei        | BeV     | MN561699    | QKZ93219.1 |
|                         | Jeilongvirus felis           | FPaV    | LC431581    | BBG92175.1 |
|                         | Jeilongvirus madagascarensis | BatPV-2 | MG203878    | AYM47538.1 |
|                         | Jeilongvirus murinae         | BatPV-3 | KJ641657    | AIF74192.1 |
|                         | Jeilongvirus rungweense      | RuV     | MW579602    | QRN45791.1 |
|                         | Lophuromys jeilongvirus 2    | MMLV-2  | MG573141    | AVM86027.1 |
|                         | Miniopterus jeilongvirus     | ShaV    | KY370098.1  | AXR70620.1 |
|                         | Myodes jeilongvirus          | PMPV-1  | MG516455    | AVM86048.1 |
|                         | Tailam jeilongvirus          | TaiV    | NC025355    | AEU08865.1 |
| <i>Morbillivirus</i>    | Canine morbillivirus         | CDV     | AF014953.1  | AAC26996.1 |
|                         | Cetacean morbillivirus       | DMV     | AJ608288.1  | CAE55659.1 |
|                         | Feline morbillivirus         | FeMV    | JQ411014.1  | AFH55518.1 |
|                         | Measles morbillivirus        | MeV     | AB016162.1  | BAA35122.1 |
|                         | Phocine morbillivirus        | PDV     | KC802221.1  | AGL33555.1 |
|                         | Rinderpest morbillivirus     | RPRV    | X98291.3    | CAA66935.2 |
|                         | Small ruminant morbillivirus | RPV     | AJ849636.2  | CAH61259.1 |
| <i>Narmovirus</i>       | Mossman narmovirus           | MossV   | NC_005339.1 | AAQ23993.1 |
|                         | Myodes narmovirus            | Bav-1   | MF943130.1  | ATW63190.1 |
|                         | Nariva narmovirus            | NarV    | NC_017937.1 | ACL97360.2 |
|                         | Tupaia narmovirus            | TupV    | NC_002199.1 | AAF63393.1 |
| <i>Respirovirus</i>     | Bovine respirovirus 3        | BPIV-3  | AF178654.1  | AAF28259.1 |
|                         | Caprine respirovirus 3       | CPIV-3  | NC_028362.1 | AKO90683.1 |
|                         | Human respirovirus 1         | HPIV-1  | AF457102.1  | AAL89409.1 |
|                         | Human respirovirus 3         | HPIV-3  | AB012132.1  | ABY47607.1 |
|                         | Murine respirovirus          | MurV    | MH557085.1  | BAD74230.1 |
|                         | Porcine respirovirus 1       | PorV    | JX857409.1  | AGR39549.1 |
|                         | Squirrel respirovirus        | GSqV    | LS992584    | SYZ47181.1 |
| <i>Salemvirus</i>       | Salem salemvirus             | SalV    | NC_025386.1 | AFM97198.1 |
| <i>Orthorubulavirus</i> | Human orthorubulavirus 2     | HPIV-2  | X57559.1    | CAA40788.1 |
|                         | Human orthorubulavirus 4     | HPIV-4  | NC_021928.1 | BAJ11747.1 |
|                         | Mammalian orthorubulavirus 5 | PIV-5   | AF052755    | AAC95518.1 |
|                         | Mammalian orthorubulavirus 6 | AlsV    | MH972568    | MH972568   |
|                         | Mapuera orthorubulavirus     | MapV    | NC_009489.1 | ABQ23938.1 |
|                         | Mumps orthorubulavirus       | MuV     | AB040874.1  | BAA94391.1 |
|                         | Porcine orthorubulavirus     | LPMV    | BK005918    | DAA06049.1 |
|                         | Simian orthorubulavirus      | SV-41   | NC_006428.1 | CAA45569.1 |
| <i>Pararubulavirus</i>  | Achimota pararubulavirus 1   | AchV-1  | JX051319.1  | AFX75110.1 |
|                         | Achimota pararubulavirus 2   | AchV-2  | JX051320.1  | AFX75118.1 |
|                         | Hervey pararubulavirus       | HerV    | KU672593    | -          |
|                         | Menangle pararubulavirus     | MenV    | JX112711.1  | AFY09794.1 |

|                          |        |            |            |
|--------------------------|--------|------------|------------|
| Sosuga pararubulavirus   | SoRV   | KF774436.1 | AHH02041.1 |
| Teviot pararubulavirus   | TeV    | KP271124.1 | AJP33335.1 |
| Tioman pararubulavirus   | TioV   | AF298895.2 | AAM82288.1 |
| Tuhoko pararubulavirus 1 | TuhV-1 | GU128080.1 | ADI80715.1 |
| Tuhoko pararubulavirus 3 | TuhV-3 | GU128082.1 | ADI80729.1 |
| Tuhoko pararubulavirus 2 | TuhV-2 | GU128081.1 | ADI80722.1 |

**Table S2.** Nucleotide similarity (%) between our J paramyxovirus and other 14 species in genus *Jeilongvirus* based on a 709-bp fragment of the L gene.

| L-709bp | BeiV | MisPV | BatPV-3 | TaiV | ShaV | RoPV | BatPV-1 | BatPV-2 | MMLV-1 | MMLV-2 | FPaV | BeV  | RuV  | PMPV-1 |
|---------|------|-------|---------|------|------|------|---------|---------|--------|--------|------|------|------|--------|
| JPV     | 70.6 | 65.5  | 62.4    | 71.7 | 73.2 | 63.4 | 64.8    | 63.4    | 65.0   | 68.6   | 67.2 | 62.9 | 62.2 | 70.8   |
| BeiV    | ***  | 63.7  | 61.3    | 76.7 | 74.3 | 62.0 | 62.6    | 62.7    | 63.0   | 69.1   | 65.7 | 60.6 | 61.2 | 70.2   |
| MisPV   | ***  | ***   | 65.3    | 64.3 | 64.8 | 74.8 | 75.1    | 74.4    | 67.4   | 65.0   | 66.1 | 63.6 | 66.0 | 63.0   |
| BatPV-3 | ***  | ***   | ***     | 61.7 | 63.3 | 66.9 | 65.3    | 62.4    | 65.5   | 63.3   | 63.6 | 65.5 | 63.1 | 63.4   |
| TaiV    | ***  | ***   | ***     | ***  | 72.9 | 62.4 | 64.4    | 64.1    | 67.9   | 71.0   | 67.8 | 62.9 | 62.3 | 72.7   |
| ShaV    | ***  | ***   | ***     | ***  | ***  | 65.0 | 65.3    | 65.7    | 67.9   | 69.5   | 68.9 | 59.8 | 63.7 | 70.3   |
| RoPV    | ***  | ***   | ***     | ***  | ***  | ***  | 74.7    | 76.0    | 65.8   | 66.2   | 67.5 | 63.1 | 64.3 | 63.4   |
| BatPV-1 | ***  | ***   | ***     | ***  | ***  | ***  | ***     | 75.7    | 69.2   | 67.1   | 67.8 | 63.3 | 66.0 | 65.1   |
| BatPV-2 | ***  | ***   | ***     | ***  | ***  | ***  | ***     | ***     | 66.1   | 66.2   | 66.7 | 64.3 | 63.7 | 62.9   |
| MMLV-1  | ***  | ***   | ***     | ***  | ***  | ***  | ***     | ***     | ***    | 68.6   | 67.1 | 62.2 | 66.2 | 67.4   |
| MMLV-2  | ***  | ***   | ***     | ***  | ***  | ***  | ***     | ***     | ***    | ***    | 67.7 | 63.6 | 65.8 | 69.1   |
| FPaV    | ***  | ***   | ***     | ***  | ***  | ***  | ***     | ***     | ***    | ***    | ***  | 63.0 | 67.4 | 67.8   |
| BeV     | ***  | ***   | ***     | ***  | ***  | ***  | ***     | ***     | ***    | ***    | ***  | ***  | 61.0 | 59.2   |
| RuV     | ***  | ***   | ***     | ***  | ***  | ***  | ***     | ***     | ***    | ***    | ***  | ***  | ***  | 63.1   |

**Table S3.** Positive rate of J paramyxovirus in wild small mammals in six eco-climate regions in China.

| Wild Small Mammals    |                                  | No. Positive/ No. Tested |              |                         |         |          |              | No. Total Positive /No. Total Tested (%) |
|-----------------------|----------------------------------|--------------------------|--------------|-------------------------|---------|----------|--------------|------------------------------------------|
| Family/Genus          | Species                          | Northern                 | Northeastern | Inner Mongolia-Xinjiang | Central | Southern | Southwestern |                                          |
| <i>Cricetidae</i>     |                                  | 0/80                     | 1/77         | 0/48                    | 0/1     |          | 0/33         | 1/239 (0.42)                             |
| <i>Allocricetulus</i> | <i>Allocricetulus eversmanni</i> | 0/6                      |              |                         |         |          |              | 0/6 (0)                                  |
| <i>Cricetulus</i>     | <i>Cricetulus barabensis</i>     |                          |              | 0/2                     |         |          |              | 0/2 (0)                                  |
|                       | <i>Cricetulus longicaudatus</i>  | 0/28                     |              |                         |         |          |              | 0/28 (0)                                 |
|                       | <i>Cricetulus migratorius</i>    |                          |              | 0/41                    |         |          |              | 0/41 (0)                                 |
| <i>Eothenomys</i>     | <i>Eothenomys cachinus</i>       |                          |              |                         |         |          | 0/1          | 0/1 (0)                                  |
|                       | <i>Eothenomys eleusis</i>        |                          |              |                         |         |          | 0/8          | 0/8 (0)                                  |
|                       | <i>Eothenomys miletus</i>        |                          |              |                         |         |          | 0/16         | 0/16 (0)                                 |
|                       | <i>Eothenomys proditor</i>       |                          |              |                         |         |          | 0/8          | 0/8 (0)                                  |
| <i>Microtus</i>       | <i>Microtus fortis</i>           |                          | 1/18         |                         | 0/1     |          |              | 1/19 (5.26)                              |
|                       | <i>Microtus oeconomus</i>        |                          |              | 0/1                     |         |          |              | 0/1 (0)                                  |
|                       | <i>Microtus maximowiczii</i>     |                          | 0/1          |                         |         |          |              | 0/1 (0)                                  |
| <i>Myodes</i>         | <i>Myodes rufocanus</i>          | 0/3                      | 0/5          |                         |         |          |              | 0/8 (0)                                  |

|                     |                                  |         |       |       |      |      |       |                |
|---------------------|----------------------------------|---------|-------|-------|------|------|-------|----------------|
|                     | <i>Myodes rutilus</i>            |         | 0/52  |       |      |      |       | 0/52 (0)       |
| <i>Phodopus</i>     | <i>Phodopus roborovskii</i>      |         |       | 0/4   |      |      |       | 0/4 (0)        |
| <i>Tscherskia</i>   | <i>Tscherskia triton</i>         | 0/43    | 0/1   |       |      |      |       | 0/44 (0)       |
| <b>Dipodidae</b>    |                                  |         |       | 0/18  |      |      |       | 0/18 (0)       |
| <i>Allactaga</i>    | <i>Allactaga sibirica</i>        |         |       | 0/13  |      |      |       | 0/13 (0)       |
| <i>Dipus</i>        | <i>Dipus sagitta</i>             |         |       | 0/5   |      |      |       | 0/5 (0)        |
| <b>Muridae</b>      |                                  | 15/1156 | 1/430 | 4/485 | 0/55 | 0/67 | 0/325 | 20/2518 (0.79) |
| <i>Apodemus</i>     | <i>Apodemus agrarius</i>         | 1/220   | 1/170 |       | 0/31 |      |       | 2/421 (0.48)   |
|                     | <i>Apodemus chevrieri</i>        |         |       |       |      |      | 0/56  | 0/56 (0)       |
|                     | <i>Apodemus draco</i>            | 0/60    |       |       |      |      |       | 0/60 (0)       |
|                     | <i>Apodemus ilex</i>             |         |       |       |      |      | 0/80  | 0/80 (0)       |
|                     | <i>Apodemus peninsulae</i>       | 1/40    | 0/20  |       |      |      |       | 1/60 (1.67)    |
|                     | <i>Apodemus sylvaticus</i>       |         |       | 0/15  |      |      |       | 0/15 (0)       |
| <i>Bandicota</i>    | <i>Bandicota indica</i>          |         |       |       |      | 0/14 |       | 0/14 (0)       |
| <i>Berylmys</i>     | <i>Berylmys bowersi</i>          |         |       |       |      |      | 0/1   | 0/1 (0)        |
| <i>Chiropodomys</i> | <i>Chiropodomys gliroides</i>    |         |       |       |      |      | 0/1   | 0/1 (0)        |
| <i>Melomys</i>      | <i>Melomys burtoni</i>           |         |       |       |      |      | 0/2   | 0/2 (0)        |
| <i>Meriones</i>     | <i>Meriones libycus</i>          |         |       | 0/42  |      |      |       | 0/42 (0)       |
|                     | <i>Meriones meridianus</i>       |         |       | 0/57  |      |      |       | 0/57 (0)       |
|                     | <i>Meriones tamariscinus</i>     |         |       | 0/2   |      |      |       | 0/2 (0)        |
|                     | <i>Meriones unguiculatus</i>     |         |       | 0/181 |      |      |       | 0/181 (0)      |
| <i>Micromys</i>     | <i>Micromys minutus</i>          |         |       |       |      |      | 0/1   | 0/1 (0)        |
| <i>Mus</i>          | <i>Mus musculus</i>              | 13/349  | 0/10  | 4/93  |      |      |       | 17/452 (3.76)  |
|                     | <i>Mus pahari</i>                |         |       |       |      |      | 0/6   | 0/6 (0)        |
| <i>Niviventer</i>   | <i>Niviventer andersoni</i>      | 0/2     |       |       |      |      | 0/4   | 0/6 (0)        |
|                     | <i>Niviventer confucianus</i>    | 0/24    |       |       | 0/9  |      |       | 0/33 (0)       |
|                     | <i>Niviventer coxingi</i>        |         |       |       |      |      | 0/7   | 0/7 (0)        |
|                     | <i>Niviventer fulvescens</i>     |         |       |       | 0/15 |      |       | 0/15 (0)       |
|                     | <i>Niviventer niviventer</i>     | 0/18    |       |       |      |      |       | 0/18 (0)       |
| <i>Rattus</i>       | <i>Rattus andamanensis</i>       |         |       |       |      | 0/11 |       | 0/11 (0)       |
|                     | <i>Rattus brunneusculus</i>      |         |       |       |      |      | 0/7   | 0/7 (0)        |
|                     | <i>Rattus norvegicus</i>         | 0/158   | 0/230 | 0/20  |      | 0/37 |       | 0/445 (0)      |
|                     | <i>Rattus pyctoris</i>           |         |       | 0/1   |      |      |       | 0/1 (0)        |
|                     | <i>Rattus steini</i>             |         |       |       |      |      | 0/7   | 0/7 (0)        |
|                     | <i>Rattus tanezumi</i>           | 0/285   |       |       |      | 0/5  | 0/144 | 0/434 (0)      |
|                     | <i>Rattus yunnanensis</i>        |         |       |       |      |      | 0/9   | 0/9 (0)        |
| <b>Sciuridae</b>    |                                  | 0/5     | 0/8   | 0/84  |      |      | 0/3   | 0/100 (0)      |
| <i>Callosciurus</i> | <i>Callosciurus erythraeus</i>   | 0/5     |       |       |      |      |       | 0/5 (0)        |
| <i>Spermophilus</i> | <i>Spermophilus dauricus</i>     |         |       | 0/28  |      |      |       | 0/28 (0)       |
|                     | <i>Spermophilus erythrogenys</i> |         |       | 0/31  |      |      |       | 0/31 (0)       |
|                     | <i>Spermophilus undulatus</i>    |         |       | 0/25  |      |      |       | 0/25 (0)       |
| <i>Tamias</i>       | <i>Tamias sibiricus</i>          |         | 0/8   |       |      |      |       | 0/8 (0)        |
| <i>Tamiops</i>      | <i>Tamiops swinhoei</i>          |         |       |       |      |      | 0/3   | 0/3 (0)        |

|                     |                                 |                       |                     |                     |                 |                 |                  |                       |
|---------------------|---------------------------------|-----------------------|---------------------|---------------------|-----------------|-----------------|------------------|-----------------------|
| <i>Soricidae</i>    |                                 | 0/65                  | 0/3                 | 0/2                 | 0/16            | 0/18            | 0/44             | 0/148 (0)             |
| <i>Anourosorex</i>  | <i>Anourosorex squamipes</i>    |                       |                     |                     |                 |                 | 0/15             | 0/15 (0)              |
| <i>Blarinella</i>   | <i>Blarinella quadraticauda</i> |                       |                     |                     |                 |                 | 0/4              | 0/4 (0)               |
| <i>Crocidura</i>    | <i>Crocidura horsfieldii</i>    |                       |                     |                     |                 |                 | 0/1              | 0/1 (0)               |
|                     | <i>Crocidura lasiura</i>        | 0/20                  |                     |                     | 0/9             |                 | 0/4              | 0/33 (0)              |
|                     | <i>Crocidura shantungensis</i>  | 0/7                   |                     |                     | 0/5             |                 |                  | 0/12 (0)              |
|                     | <i>Crocidura tanakae</i>        | 0/21                  | 0/2                 |                     |                 | 0/1             | 0/5              | 0/29 (0)              |
| <i>Episoriculus</i> | <i>Episoriculus caudatus</i>    |                       |                     |                     |                 |                 | 0/3              | 0/3 (0)               |
| <i>Sorex</i>        | <i>Sorex bedfordiae</i>         |                       |                     |                     |                 |                 | 0/8              | 0/8 (0)               |
|                     | <i>Sorex caecutiens</i>         |                       |                     |                     | 0/2             |                 |                  | 0/2 (0)               |
|                     | <i>Sorex isodon</i>             |                       | 0/1                 |                     |                 |                 |                  | 0/1 (0)               |
| <i>Soriculus</i>    | <i>Episoriculus fumidus</i>     | 0/2                   |                     |                     |                 |                 |                  | 0/2 (0)               |
| <i>Suncus</i>       | <i>Suncus murinus</i>           | 0/15                  |                     | 0/2                 |                 | 0/17            | 0/4              | 0/38 (0)              |
| <i>Spalacidae</i>   |                                 |                       |                     | 0/47                |                 |                 |                  | 0/47 (0)              |
| <i>Myospalax</i>    | <i>Myospalax aspalax</i>        |                       |                     | 0/2                 |                 |                 |                  | 0/2 (0)               |
|                     | <i>Myospalax psilurus</i>       |                       |                     | 0/45                |                 |                 |                  | 0/45 (0)              |
| <b>Total</b>        |                                 | <b>15/1306 (1.15)</b> | <b>2/518 (0.39)</b> | <b>4/684 (0.58)</b> | <b>0/72 (0)</b> | <b>0/85 (0)</b> | <b>0/407 (0)</b> | <b>21/3070 (0.68)</b> |
